# Supplementary material for: Vitamin K2 promotes PI3K/AKT/HIF-1α-mediated glycolysis that leads to AMPK-dependent autophagic cell death in bladder cancer cells
Source: PubMed Central journal article supplement (PMC7206016; doi:10.1038/s41598-020-64880-x), 2020-05-07

## Supplementary information

### **Vitamin K2 promotes PI3K/AKT/HIF-1 $\alpha$ -mediated glycolysis that leads to AMPK-dependent autophagic cell death in bladder cancer cells**

**Fengsen Duan<sup>1</sup>, Chunlei Mei<sup>2</sup>, Luhao Yang<sup>2</sup>, Junyan Zheng<sup>2</sup>, Huiai Lu<sup>1</sup>, Yanzhi Xia<sup>1</sup>, Stacy Hsu<sup>4</sup>, Huageng Liang<sup>3\*</sup> and Ling Hong<sup>1\*</sup>**

<sup>1</sup> Department of Biology, College of Life Science and Technology, Huazhong University of Science and Technology, 430074 Wuhan, China

<sup>2</sup> Tongji Medical College, Huazhong University of Science and Technology, 430030 Wuhan, China

<sup>3</sup> Department of Urology, Union Hospital, Tongji Medical College, Huazhong University of Science and Technology, 430022 Wuhan, China

<sup>4</sup> Global Public Health (Biology), Pre-Medicine Track, New York University College of Arts & Science 2021, 10003 New York, USA

\*Correspondence: Huageng Liang ([leonard19800318@hust.edu.cn](mailto:leonard19800318@hust.edu.cn))

Ling Hong ([lhong@mail.hust.edu.cn](mailto:lhong@mail.hust.edu.cn))

## Supplementary Figure 1

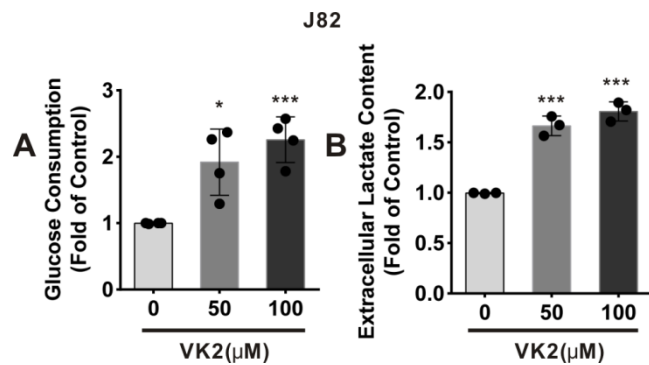

**Supplementary Figure 1 Vitamin K2 increases glucose consumption and lactate production in bladder cancer J82 cells.** (A) Vitamin K2 dose dependently affected glucose consumption in J82 cells. (B) Vitamin K2 dose dependently affected lactate generation in J82 cells. Data are presented as the mean  $\pm$  SD of three or four independent experiments. \*  $P < 0.05$  and \*\*\*  $P < 0.001$ .

## Supplementary Figure 2

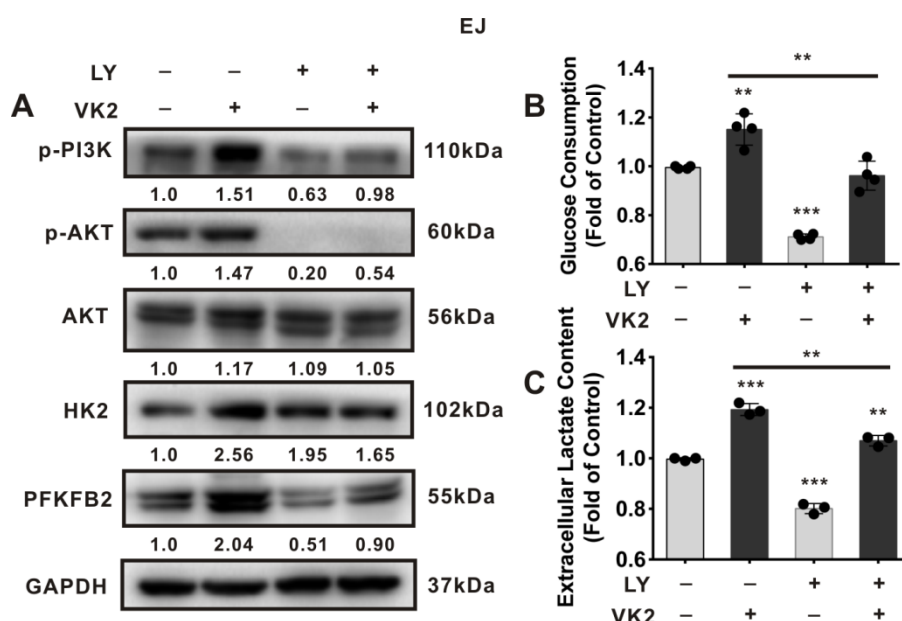

**Supplementary Figure 2 Activation of PI3K/AKT is involved in Vitamin K2-induced upregulation of glucose consumption and lactate generation in bladder cancer EJ cells.** (A) The effect of 40 $\mu$ M LY294002 (LY, a typical PI3K inhibitor) on the activation of PI3K and AKT as well as the expression of HK2 and PFKFB2 in EJ cells treated with or without 50 $\mu$ M Vitamin K2. (B) and (C) The effect of LY294002 on the glucose consumption and lactate production in EJ cells treated with or without Vitamin K2. Data are presented as the mean  $\pm$  SD of three or four independent experiments. \*\*  $P < 0.01$  and \*\*\*  $P < 0.001$ .

### Supplementary Figure 3

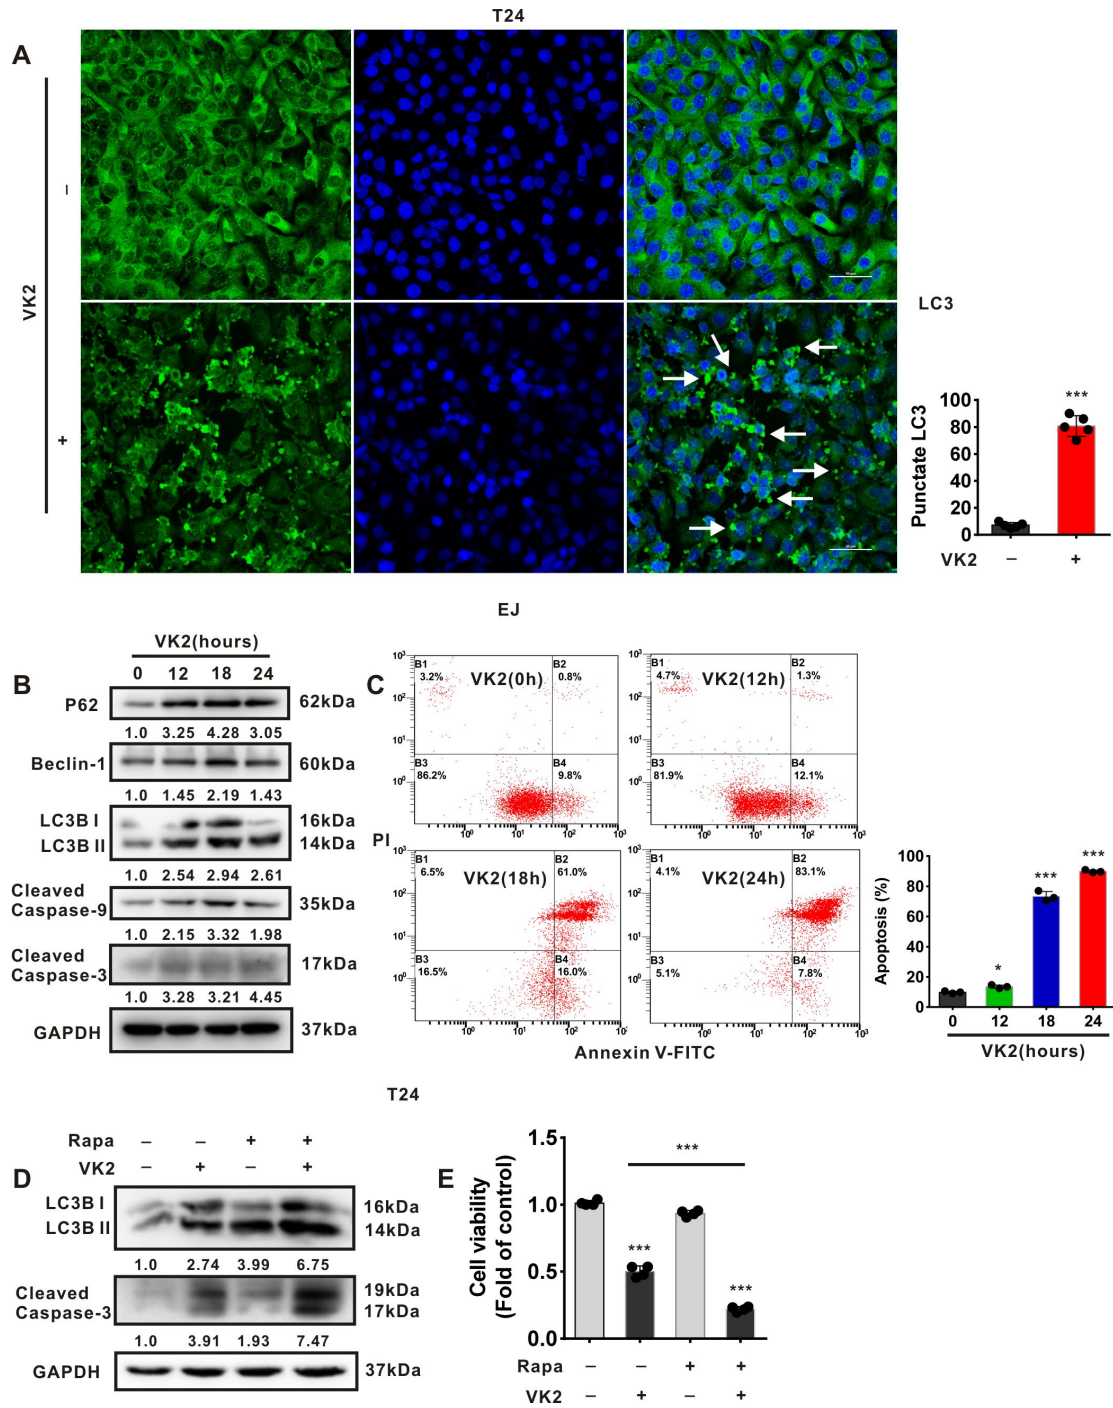

**Supplementary Figure 3 Vitamin K2 induces autophagy and apoptosis in bladder cancer cells.** (A) Immuno-Fluorescence demonstrated the expression of LC3 in T24 cells treated with or without 50 $\mu$ M Vitamin K2 for 18 hours. Arrow pointed to

punctate LC3. Scale bar: 50 $\mu$ m. (B) Western blot demonstrated the effect of Vitamin K2 on the expression of autophagic and apoptotic protein in EJ cells. (C) Flow cytometry demonstrated the apoptotic effect of Vitamin K2 on EJ cells in a time dependent manner. (D) Western blot demonstrated the effect of 20 $\mu$ M Rapamycin on Vitamin K2-induced autophagy and apoptosis in bladder cancer T24 cells. (E) MTS assays showed the effect of Rapamycin on the cell viability of T24 cells treated with or without 50 $\mu$ M Vitamin K2. Data are presented as the mean  $\pm$  SD of three or four independent experiments. \*  $P < 0.05$  and \*\*\*  $P < 0.001$ .

## Supplementary Figure 4

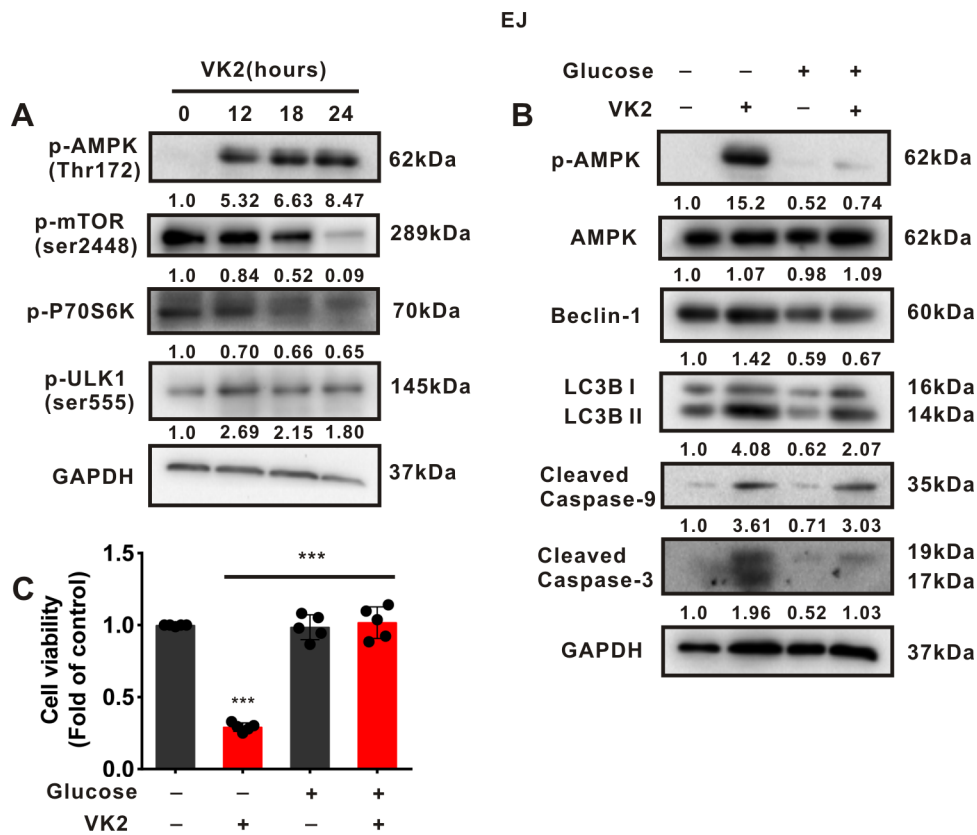

**Supplementary Figure 4 Glucose supplementation rescues bladder cancer EJ cells from AMPK-dependent autophagic cell death.** (A) Western blot showed the effect of Vitamin K2 on the activation of AMPK and mTORC1 pathway in bladder cancer EJ cells. (B) Western blot showed that 10mM glucose supplementation affected Vitamin K2-triggered AMPK activation, autophagy and apoptosis in EJ cells. (C) MTS assays showed that glucose supplementation affected the cell viability of EJ cells treated with or without 50 $\mu$ M Vitamin K2. Data are presented as the mean  $\pm$  SD of three or four independent experiments. \*\*\* P<0.001.

## Supplementary Figure 5

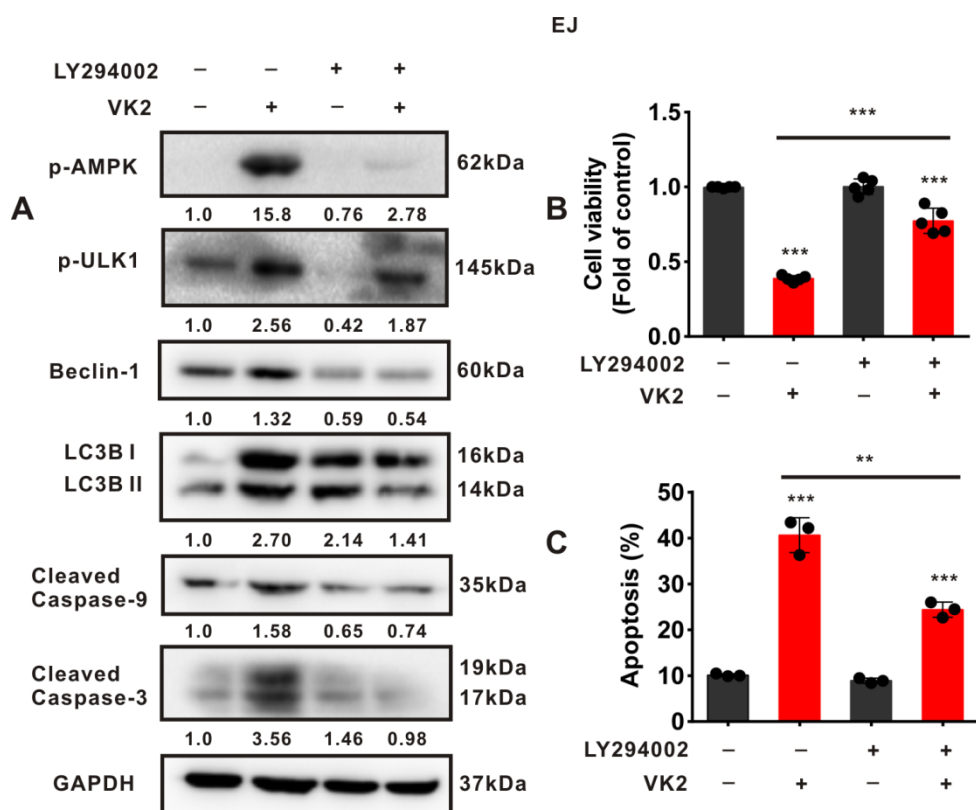

### Supplementary Figure 5 Activation of PI3K/AKT is required for Vitamin K2-triggered AMPK dependent autophagic cell death in bladder cancer EJ cells.

(A) Western blot showed the effect of 40 $\mu$ M LY294002 (LY, a typical PI3K inhibitor) on AMPK activation, autophagy and apoptosis in Vitamin K2-treated EJ cells. (B) MTS assays showed the effect of LY294002 on EJ cell viability after treatment with or without 50 $\mu$ M Vitamin K2. (C) Flow cytometry showed the effect of LY294002 on Vitamin K2-induced apoptosis in EJ cells. Data are presented as the mean  $\pm$  SD of at least three independent experiments. \*\* P<0.01 and \*\*\* P<0.001.

## Supplementary Figure 6

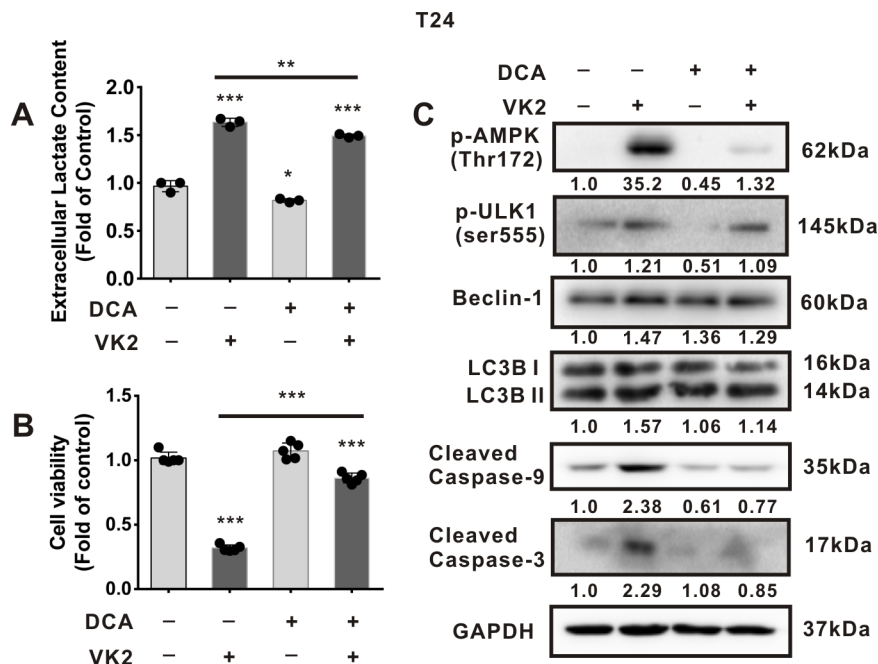

### Supplementary Figure 6 DCA attenuates the glycolysis and blocks Vitamin K2-induced AMPK dependent autophagic cell death in bladder cancer T24 cells.

(A) The effect of 30mM DCA on the lactate generation in T24 cells treated with or without 100 $\mu$ M Vitamin K2. (B) The effect of DCA on the cell viability of T24 cells treated with or without Vitamin K2. (C) Western blot showed that DCA affected Vitamin K2-induced AMPK dependent autophagic cell death in T24 cells. Data are presented as the mean  $\pm$  SD of three or four independent experiments. \*  $P < 0.05$ , \*\*  $P < 0.01$  and \*\*\*  $P < 0.001$ .



Supplementary Figure 7

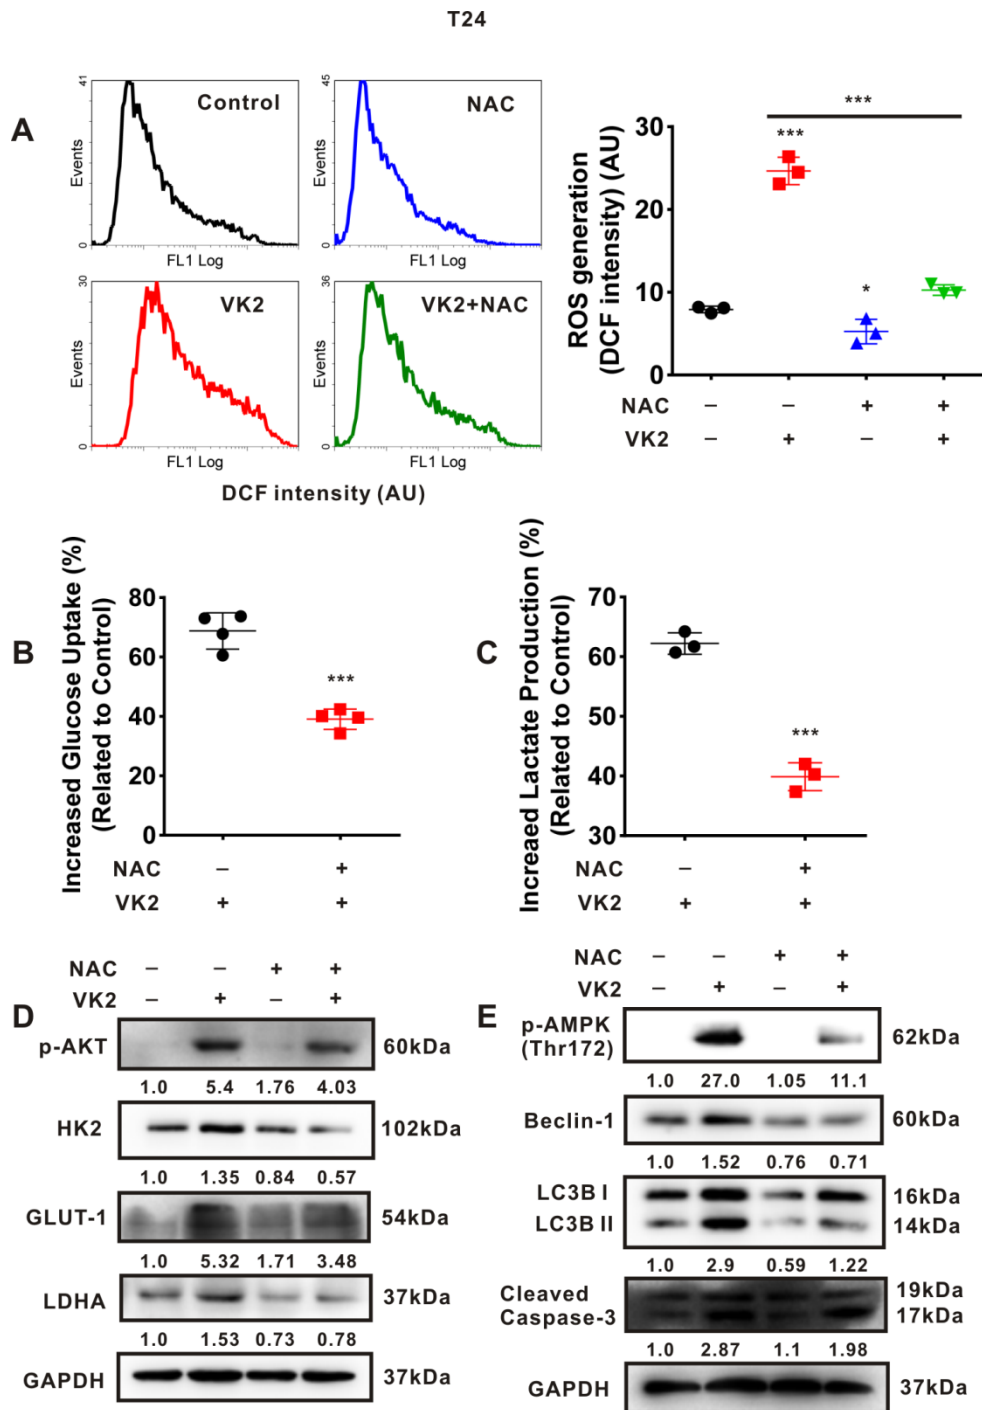

Supplementary Figure 7 ROS generation is required for Vitamin K2-upregulated glycolysis and triggered AMPK-dependent autophagic cell death in bladder

**cancer T24 cells.** (A) Flow cytometry showed the effect of 5mM N-acetyl cysteine (NAC, a ROS scavenger) on Vitamin K2-induced ROS generation in bladder cancer T24 cells. (B) and (C) The effect of NAC on Vitamin K2-elevated glucose uptake and lactate production in bladder cancer T24 cells. (D) Western blot showed the effect of NAC on the expression of glycolytic protein or enzymes in T24 cells treated with or without 50 $\mu$ M Vitamin K2. (E) Western blot showed the effect of NAC on AMPK activation, autophagy and apoptosis in T24 cells treated with or without Vitamin K2. Data are presented as the mean  $\pm$  SD of three or four independent experiments. \* P<0.05 and \*\*\* P<0.001.

The original unprocessed images for western blot and the target panels were marked in red boxes.

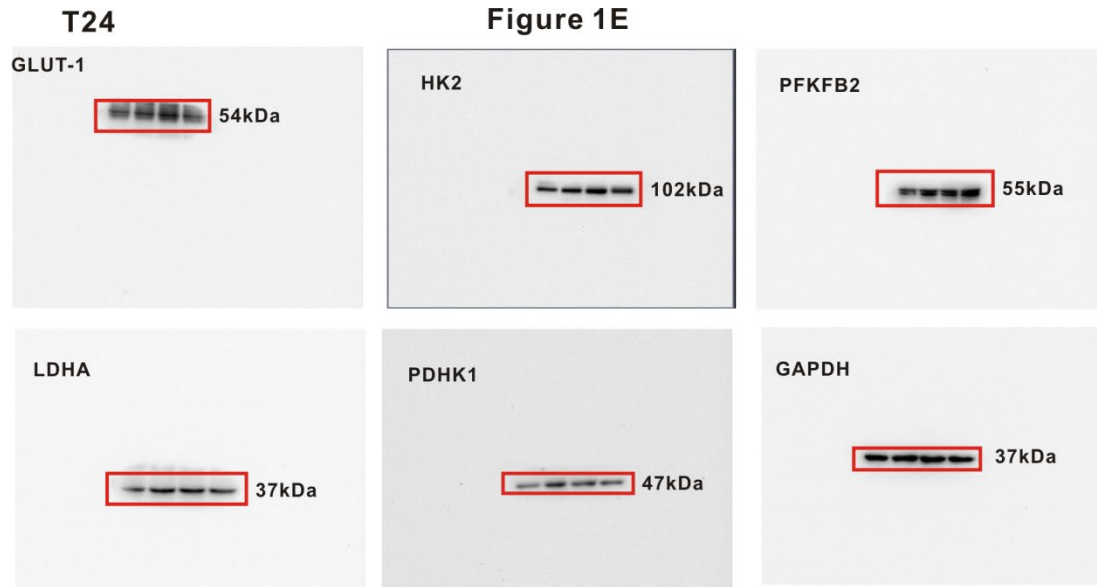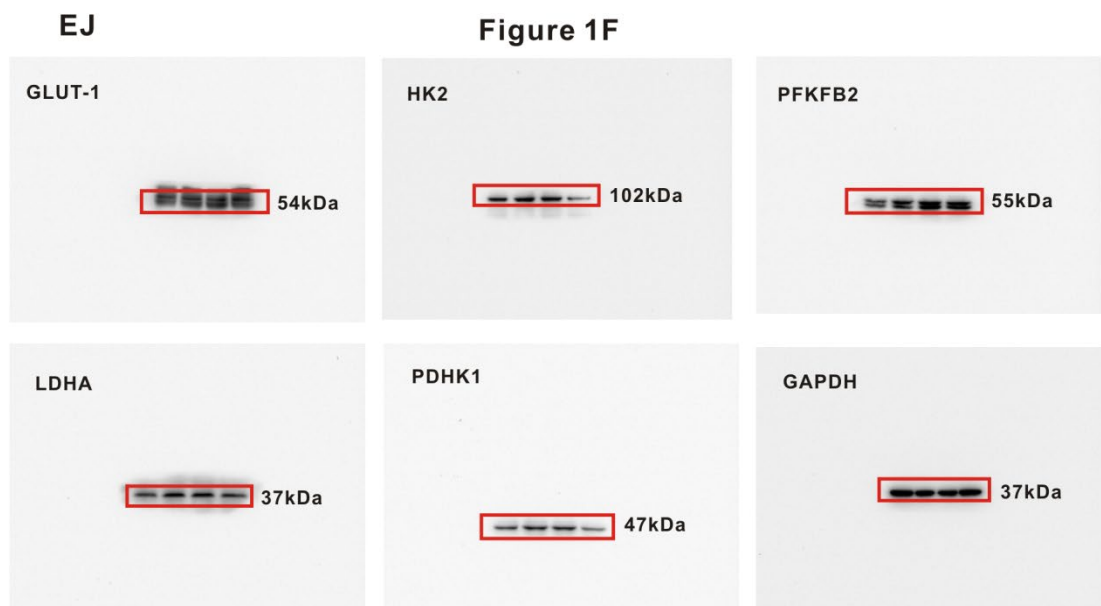

**Figure 1H**

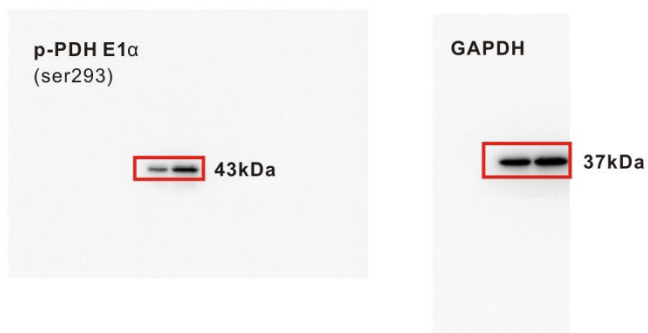

**Figure 2A**

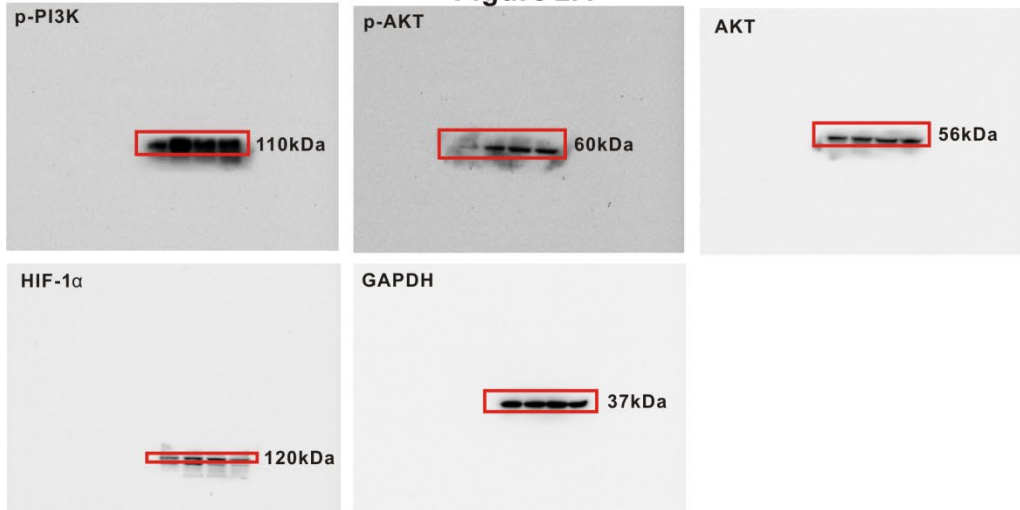

**Figure 2B**

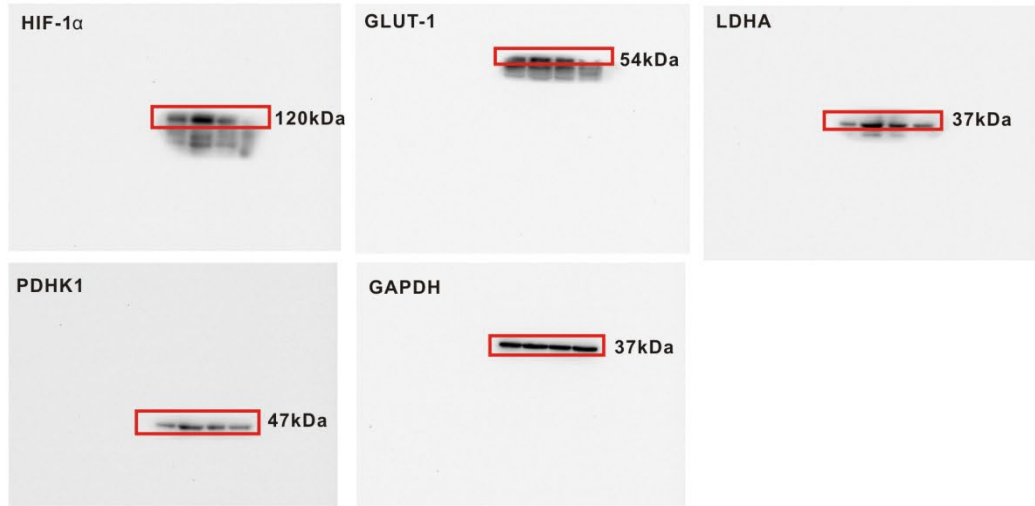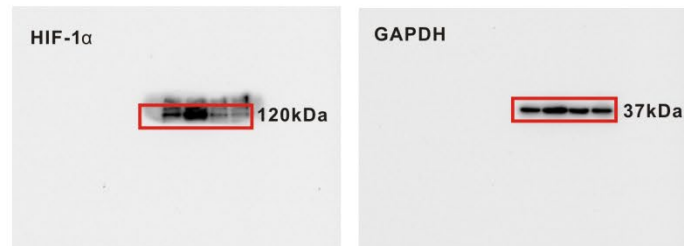

**Figure 2G**

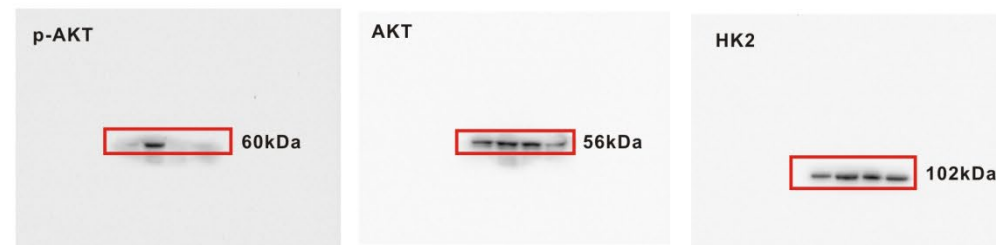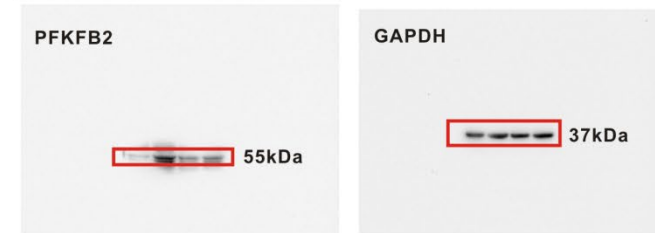

**Figure 2H**

**Figure 2K**

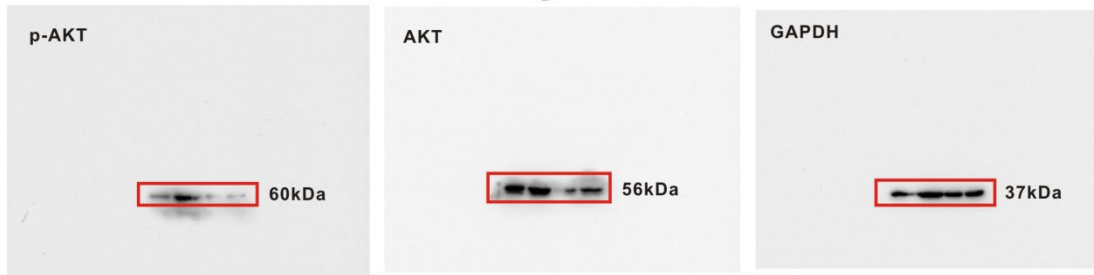

**Figure 2N**

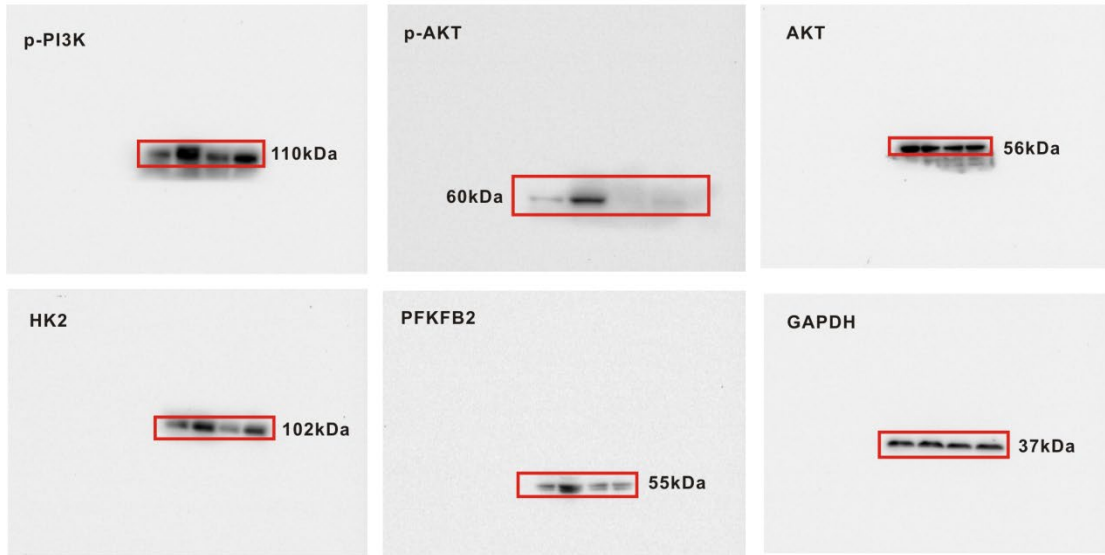

**Figure 2Q**

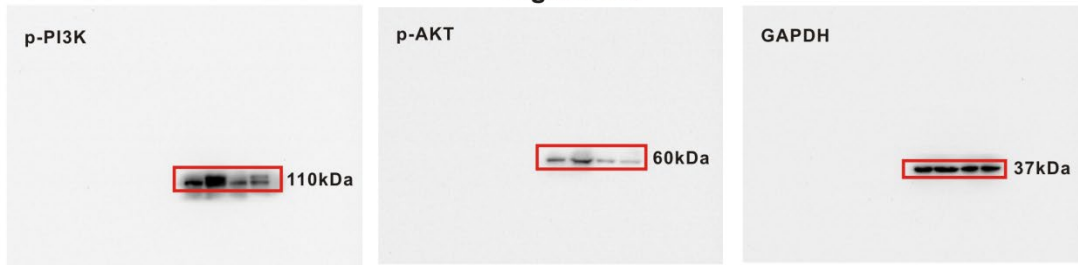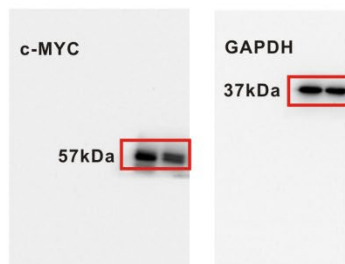

**Figure 3D**

**Figure 4A**

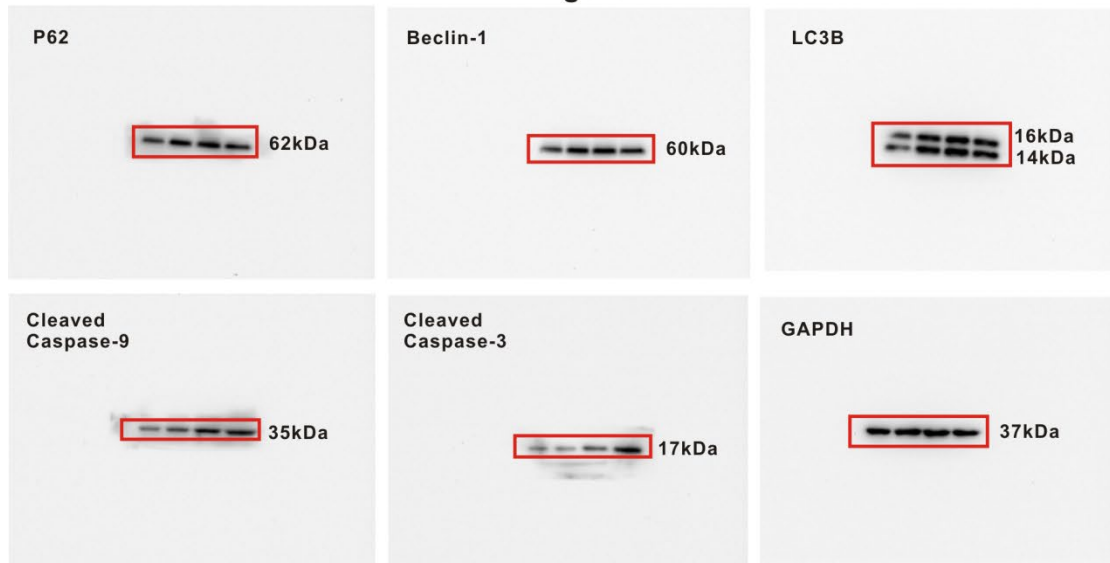

**Figure 4D**

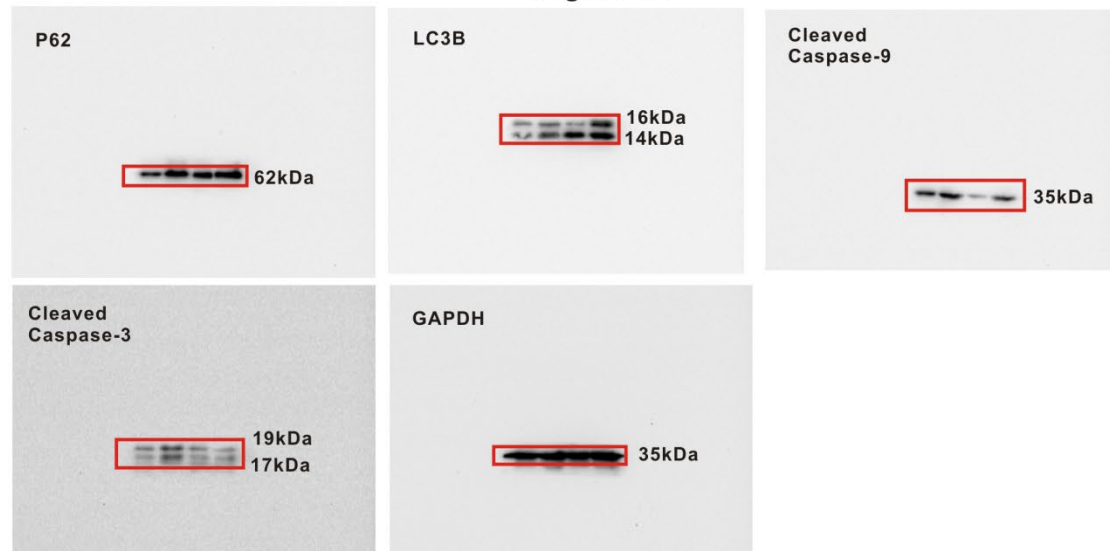

**Figure 4E**

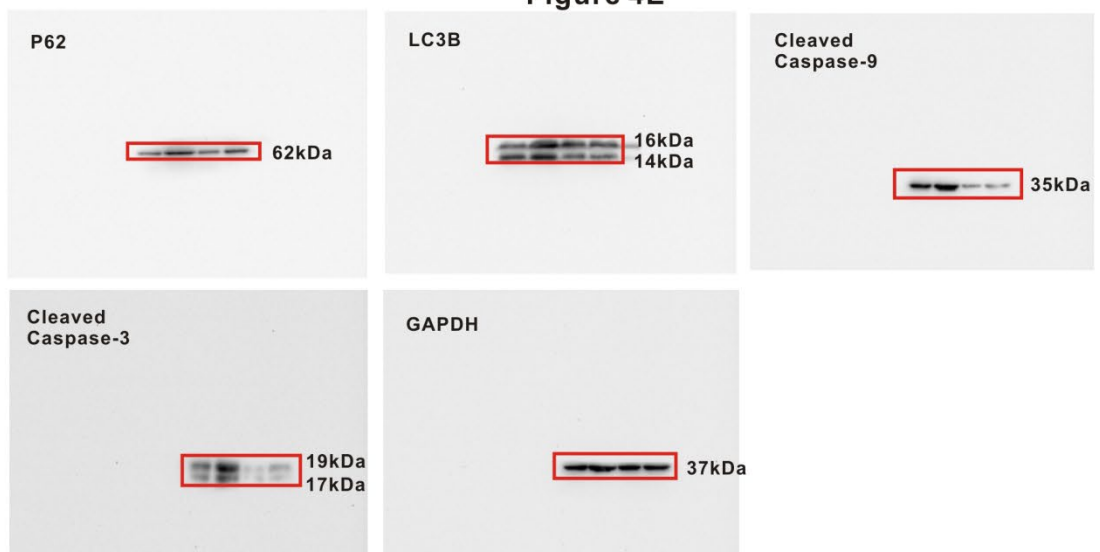

**Figure 5A**

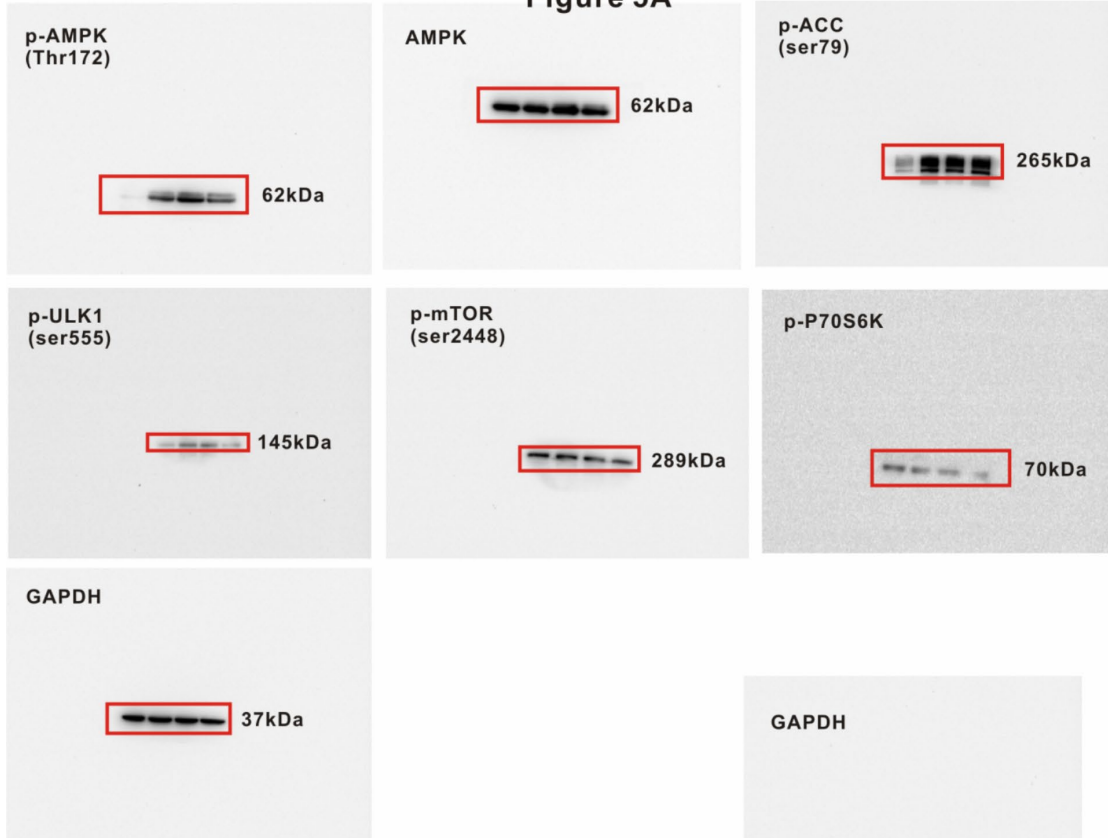

**Figure 5B**

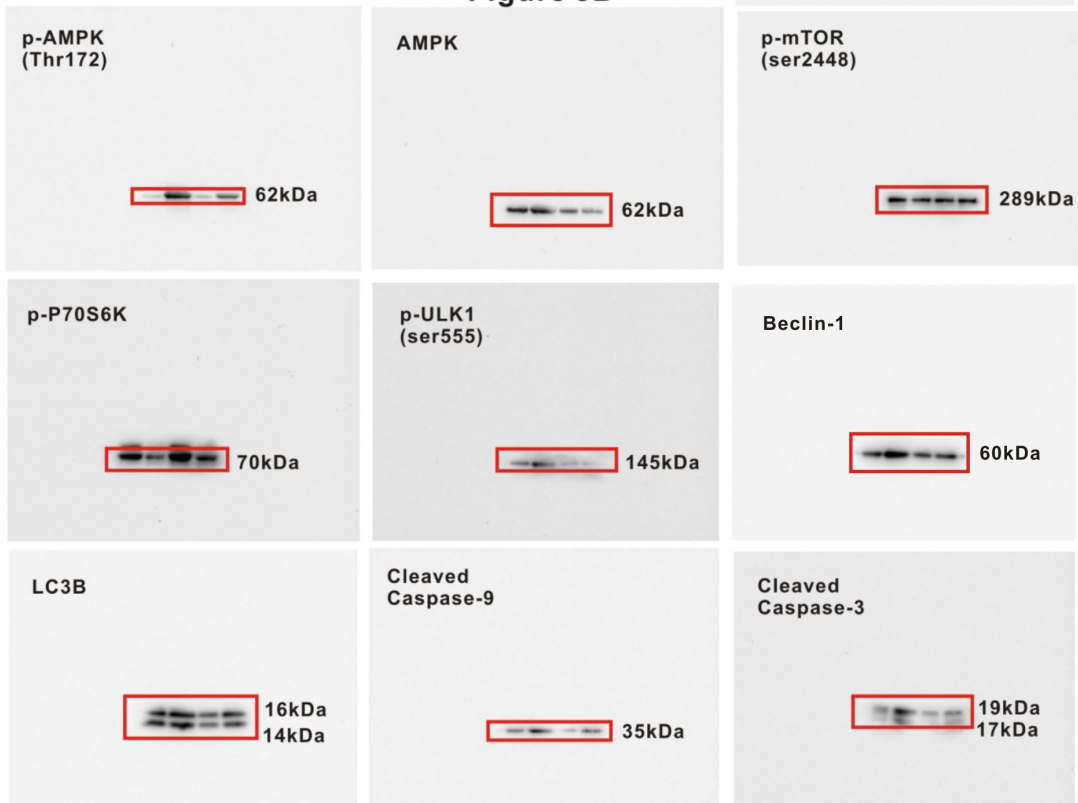

Figure 5C

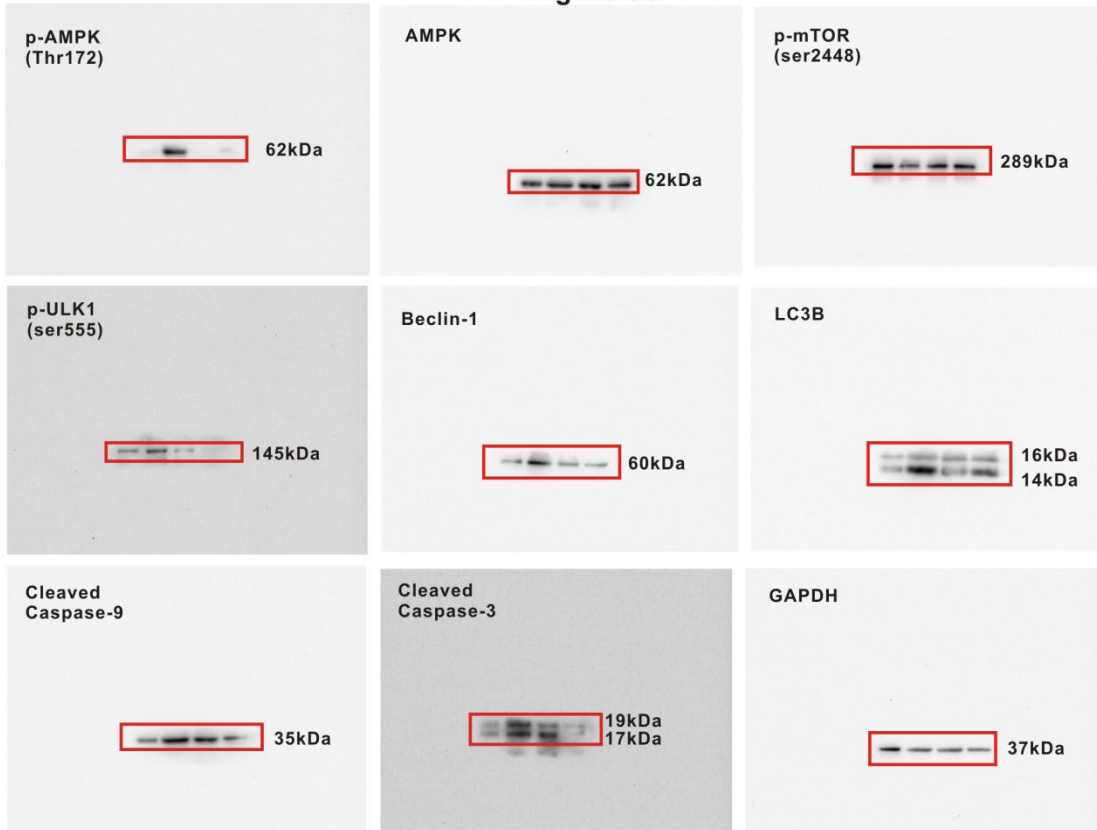

Figure 5F

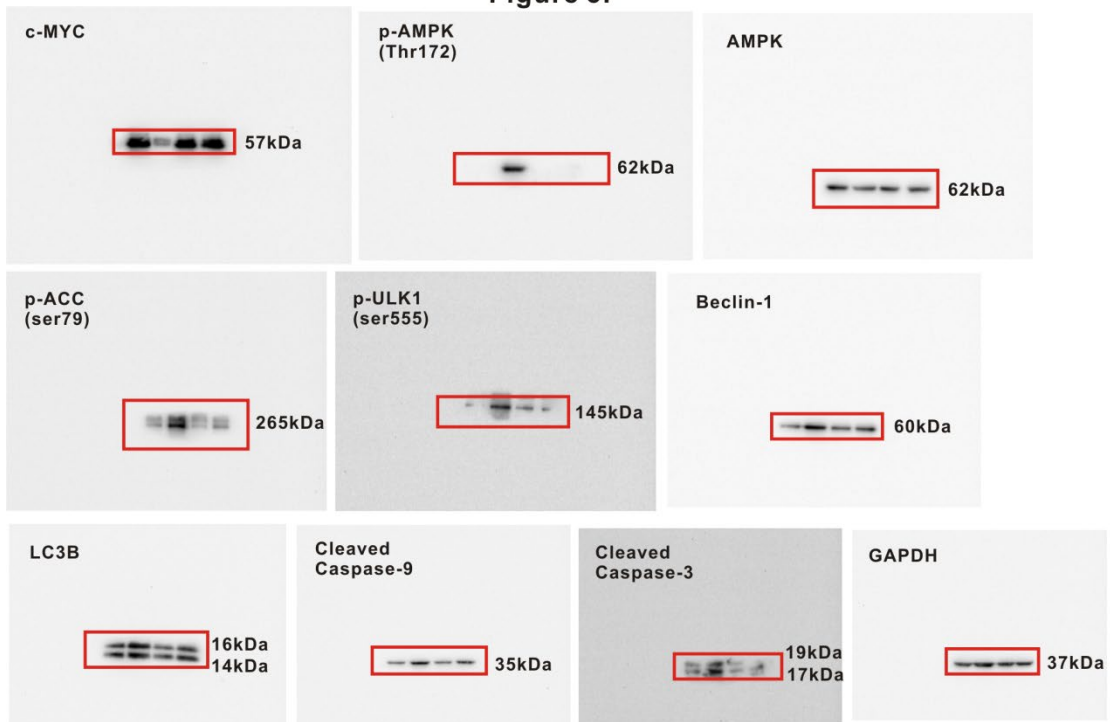



**Figure 6A**

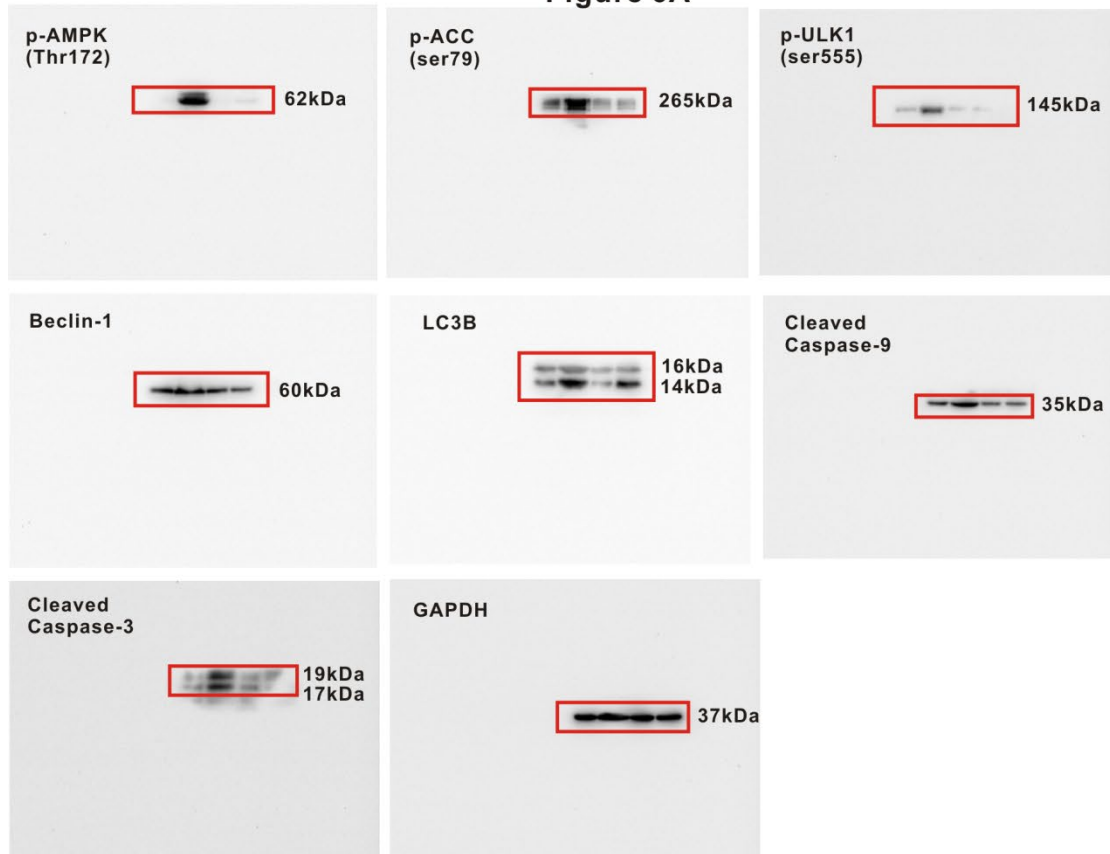

**Figure 6B**

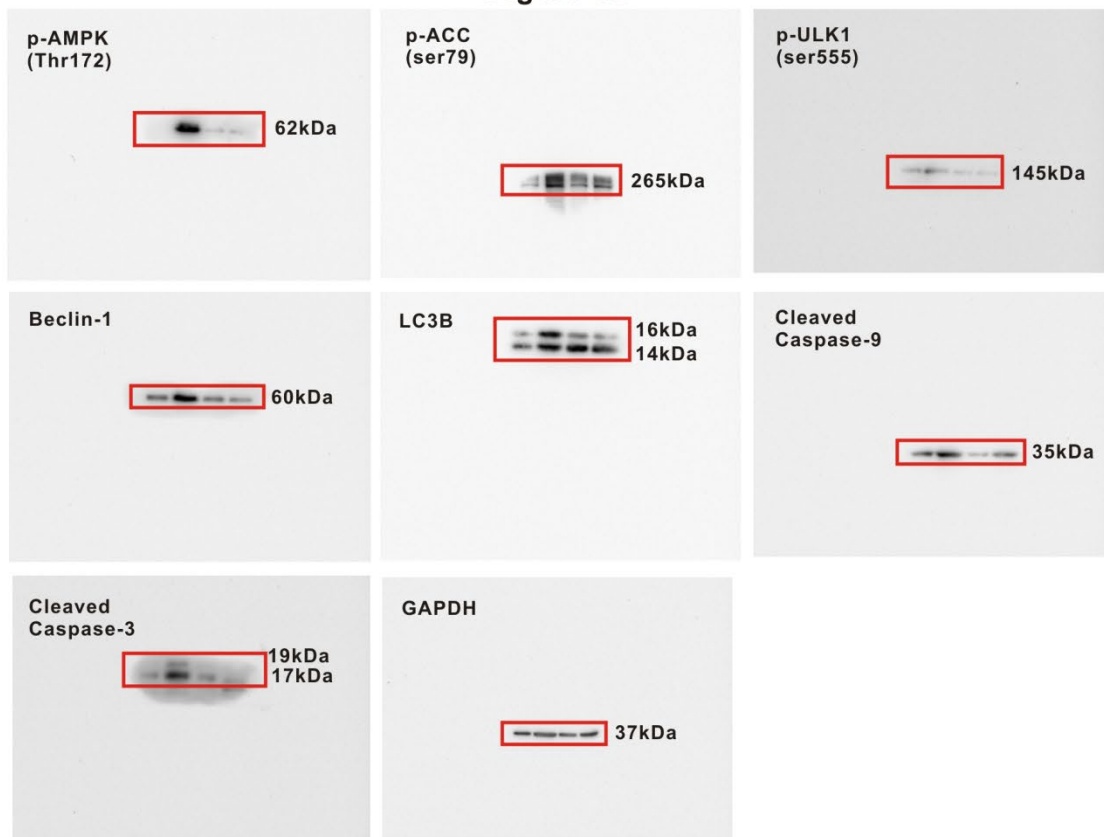

**Figure 6E**

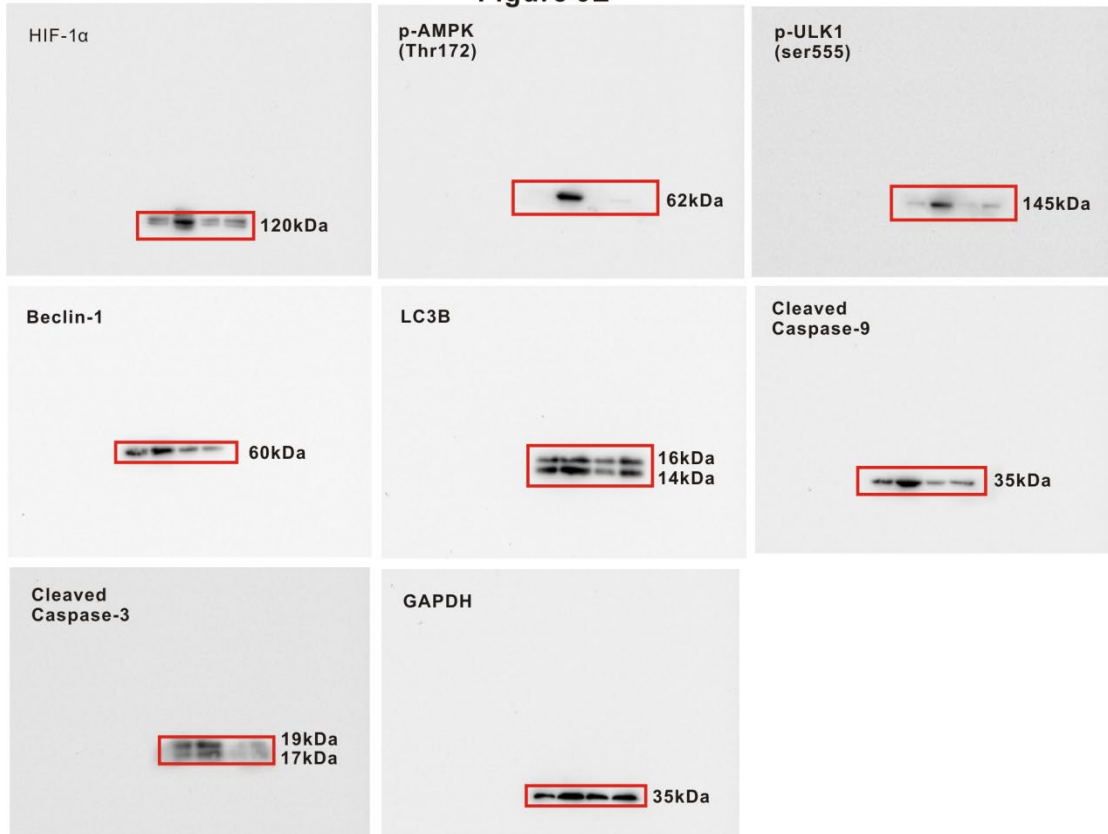

**Figure 6F**

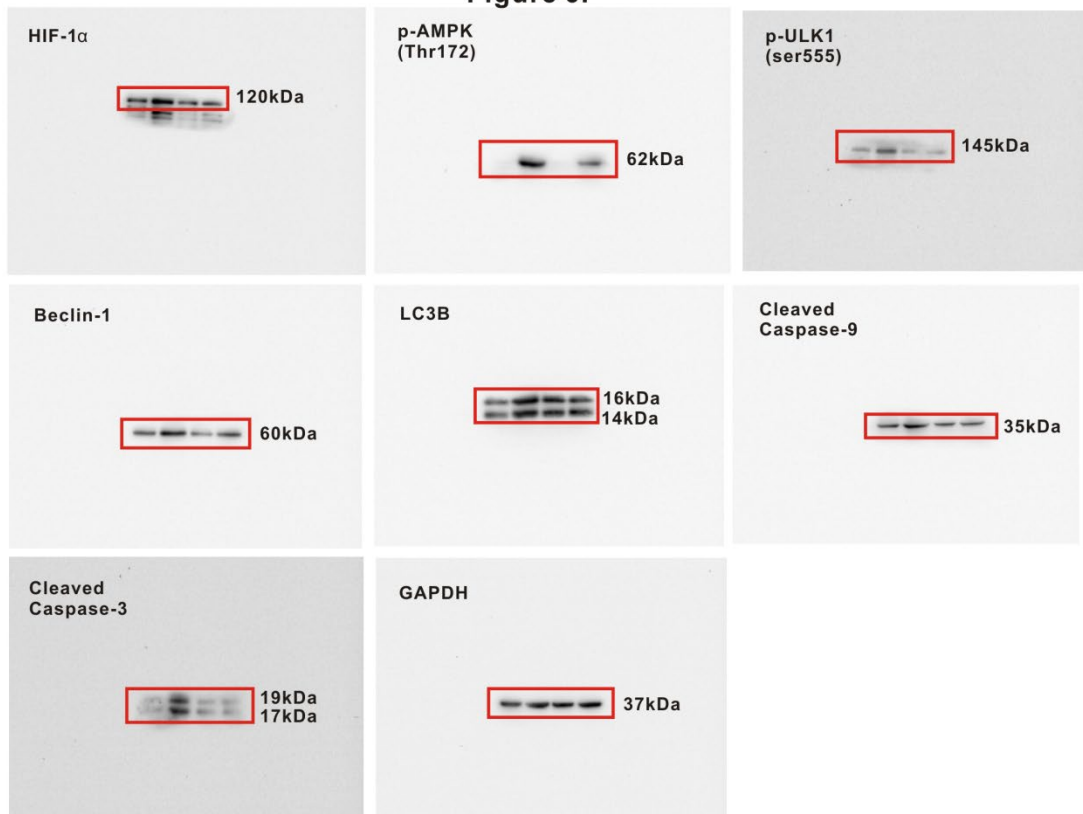

**Figure 6I**

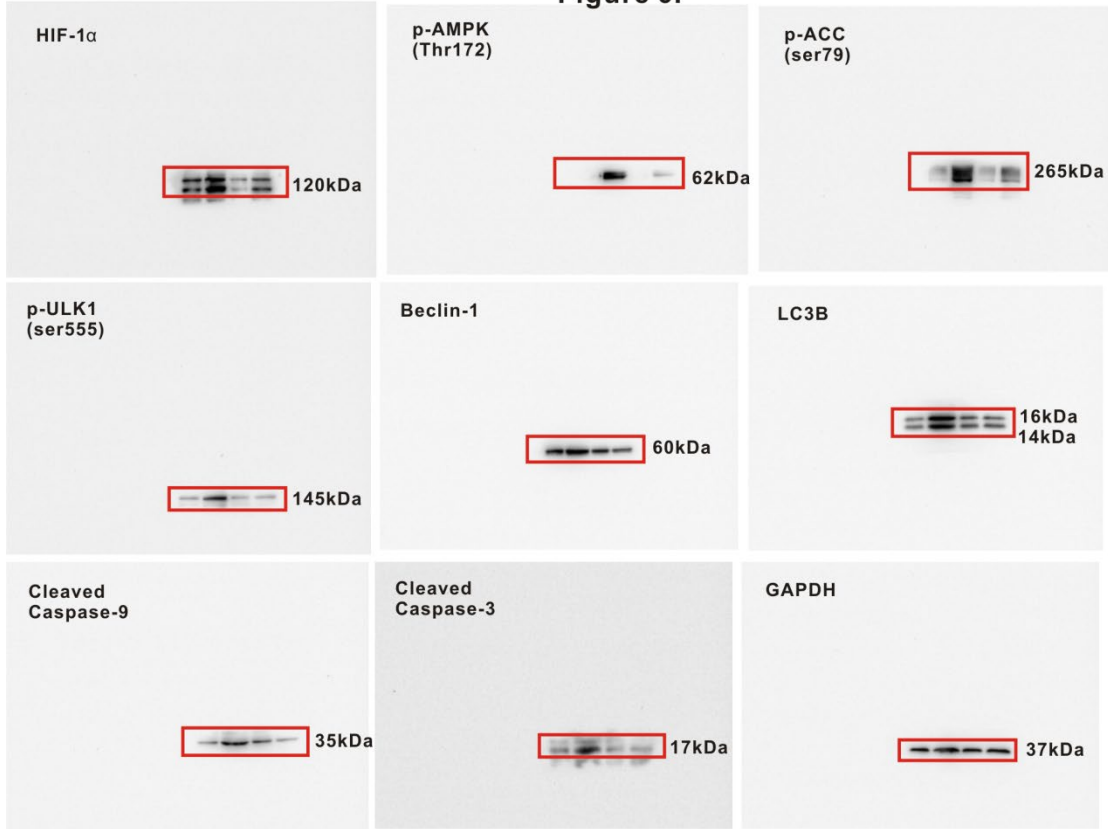

**Figure 6J**

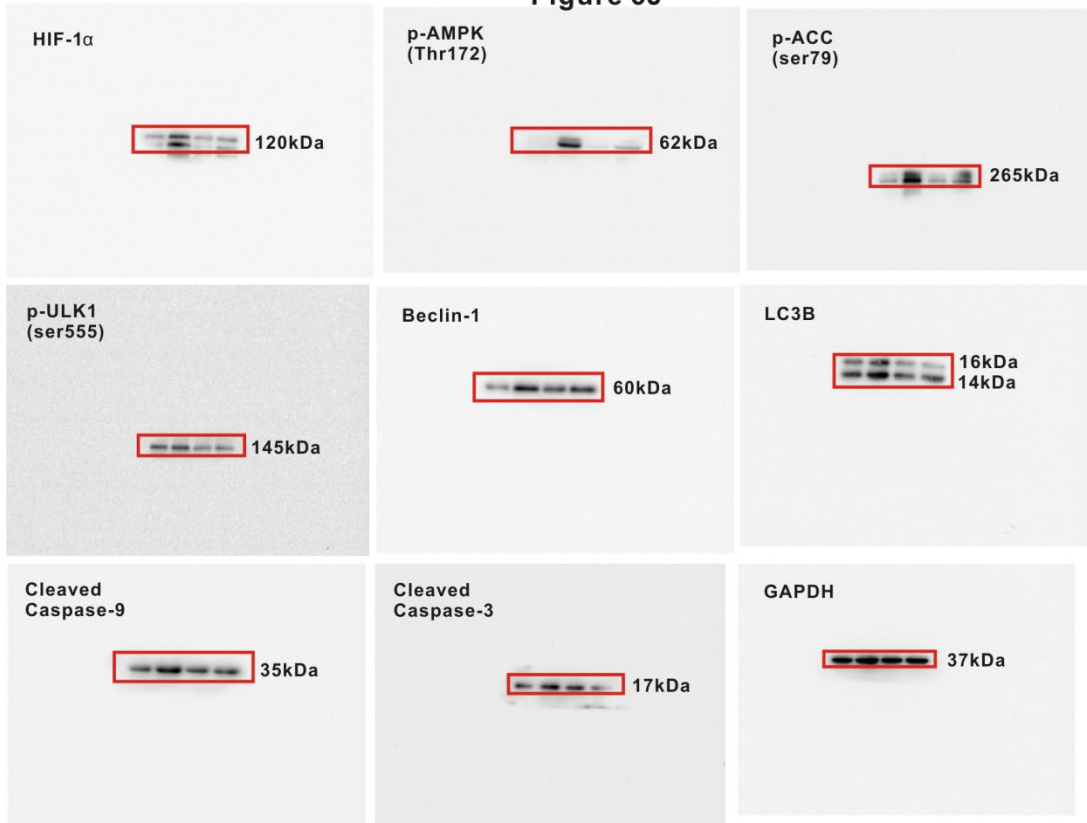

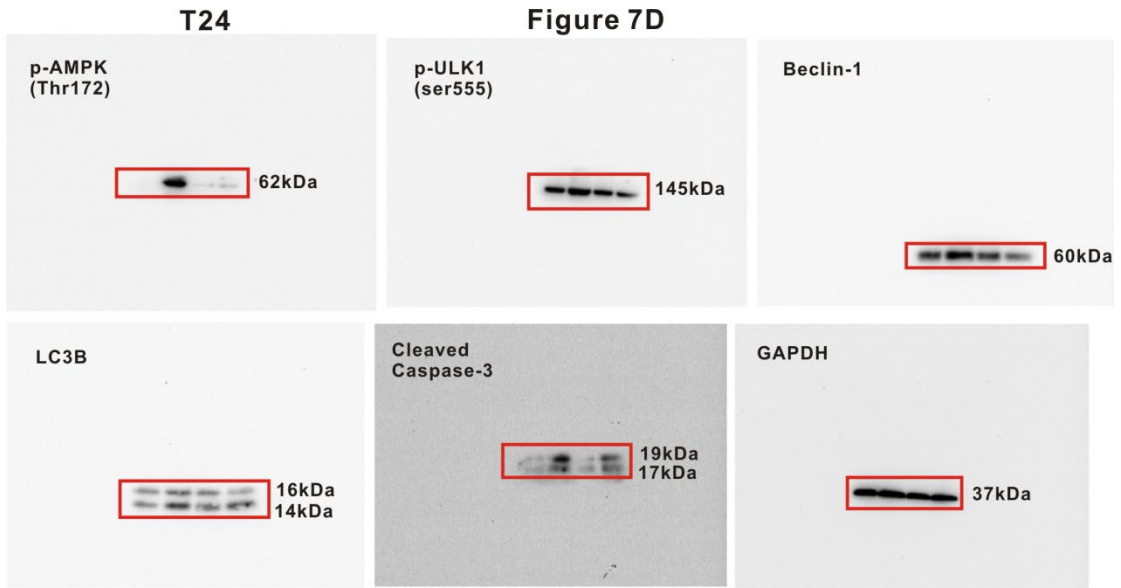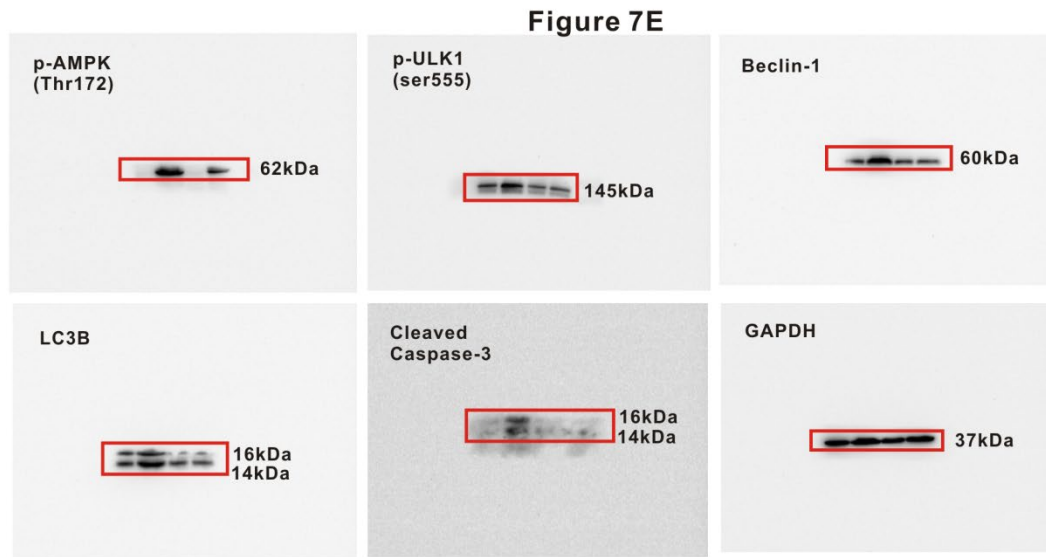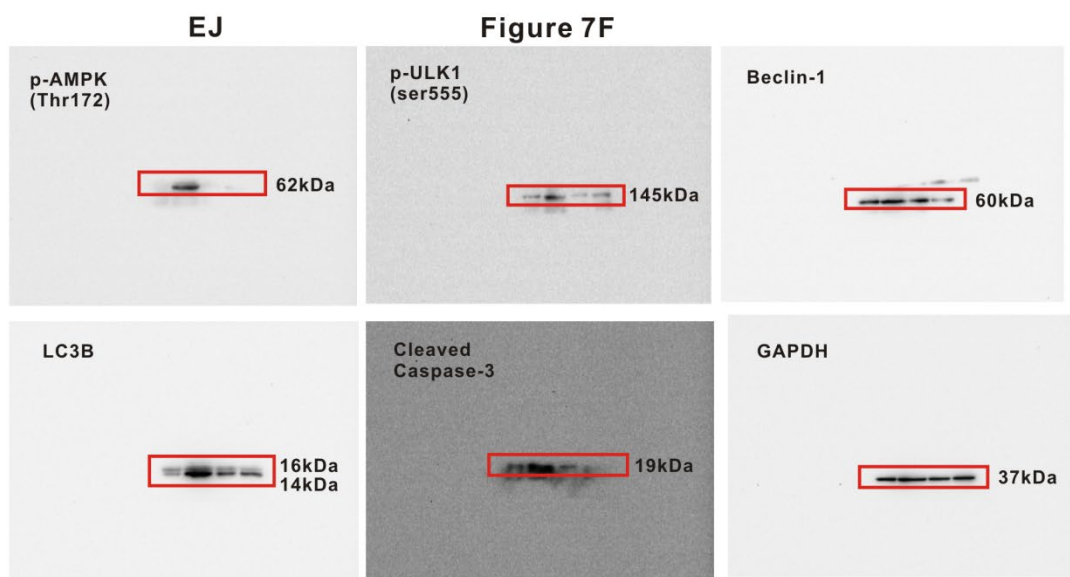

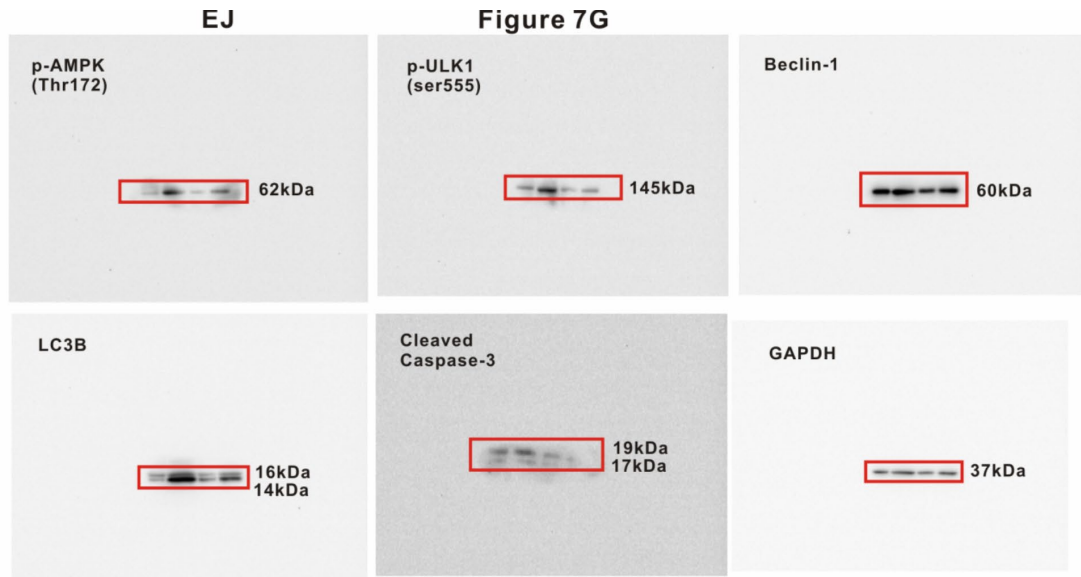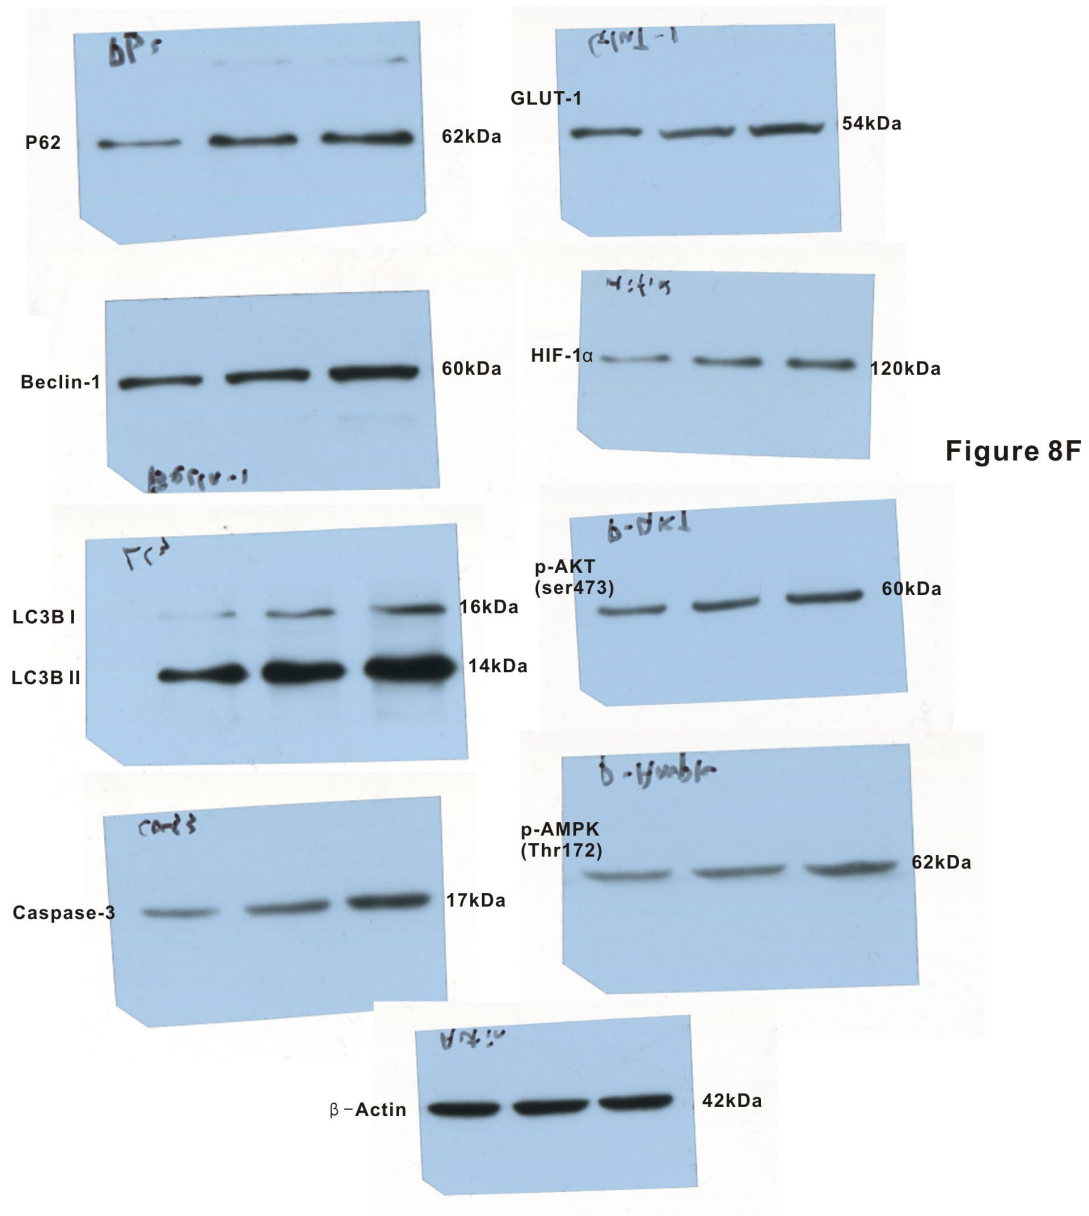

### Supplementary Figure 2A

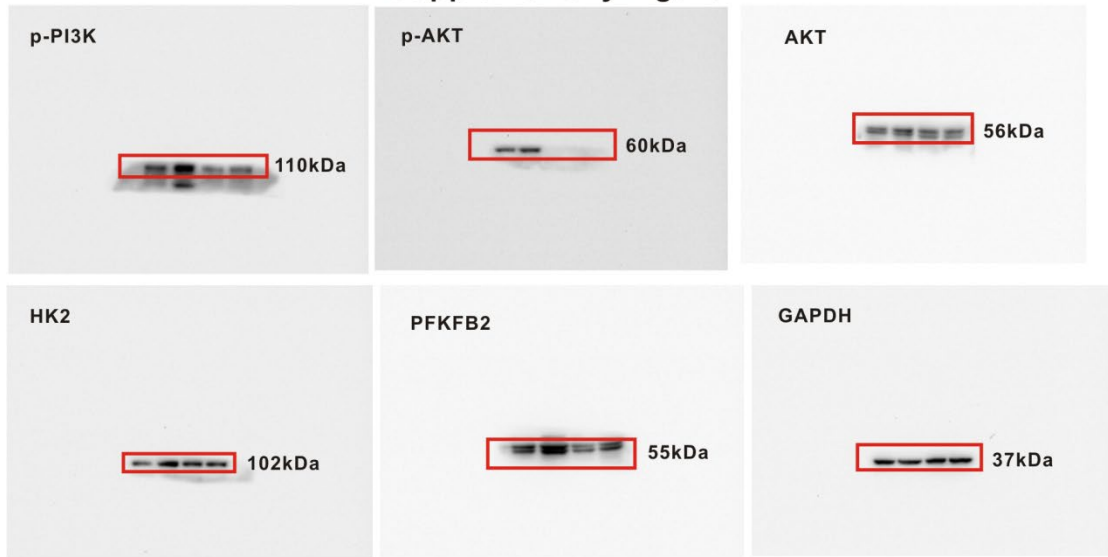

### Supplementary Figure 3B

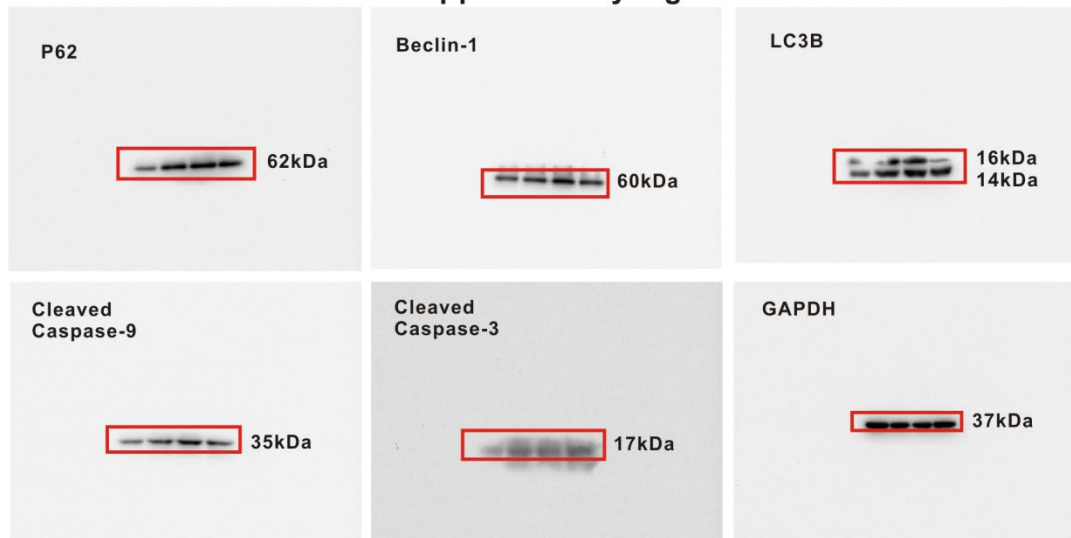

### Supplementary Figure 3D

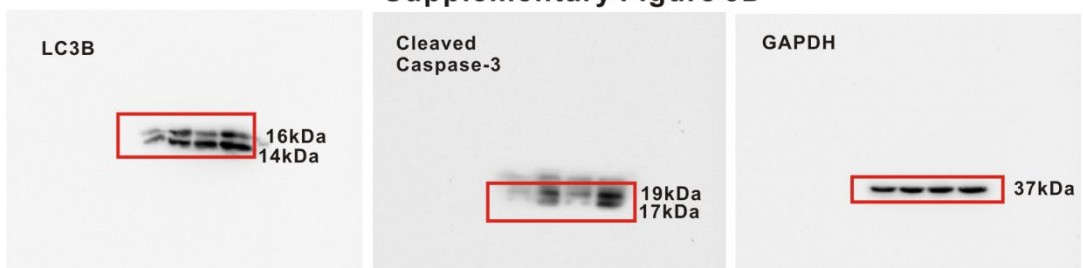



### Supplementary Figure 4A

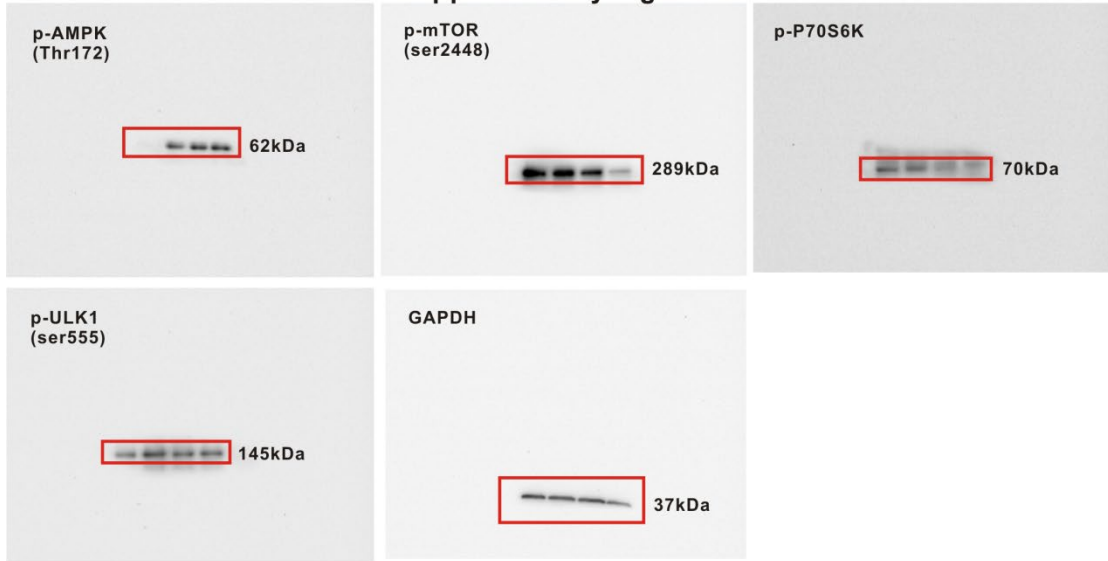

### Supplementary Figure 4B

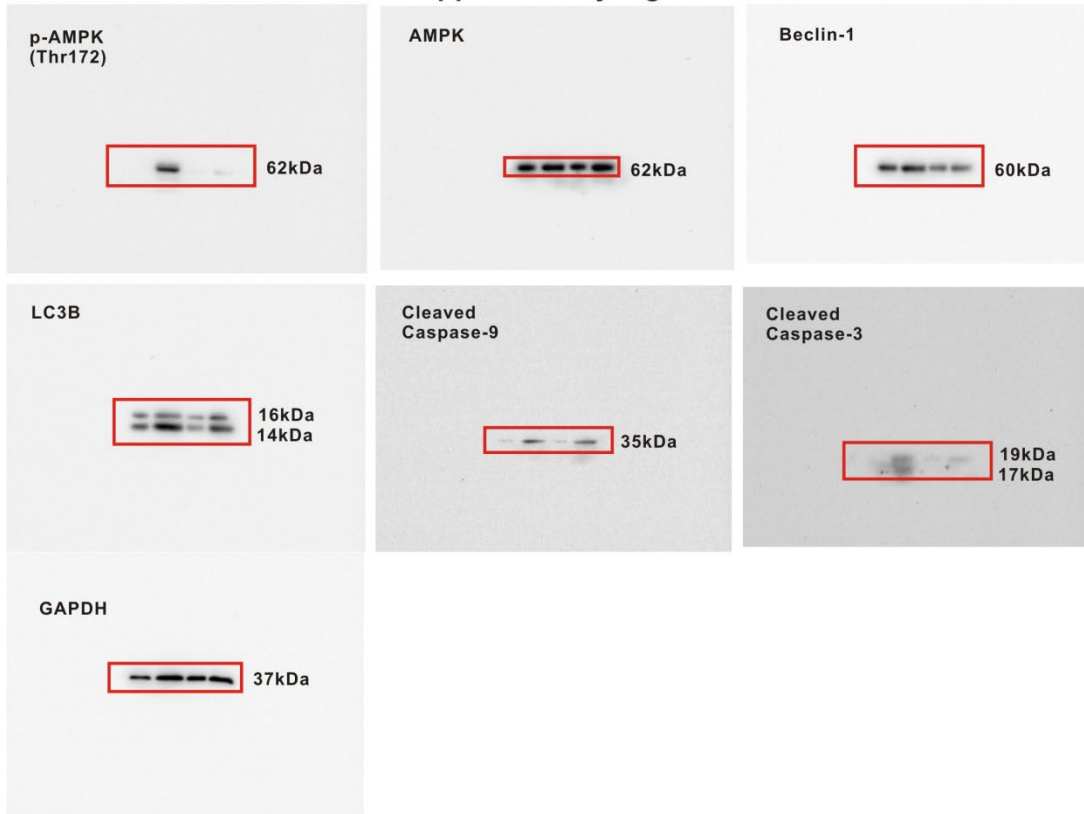

### Supplementary Figure 5A

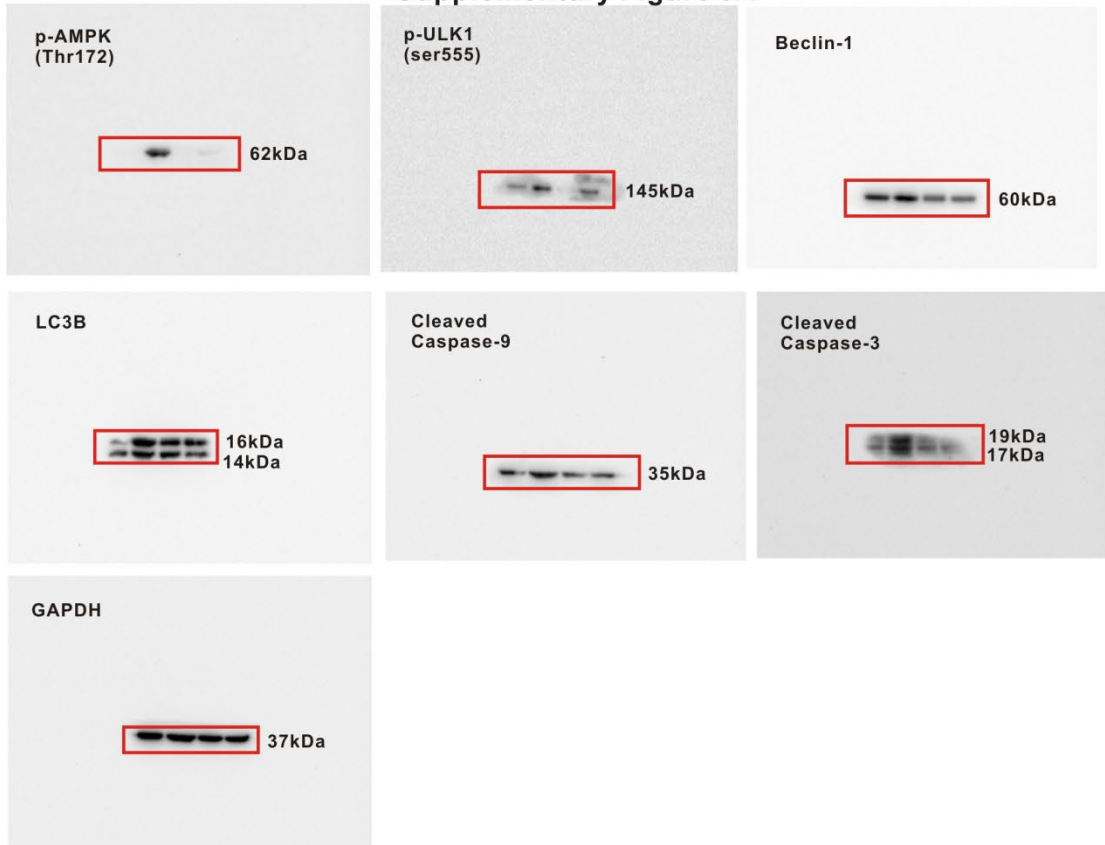

### Supplementary Figure 6C

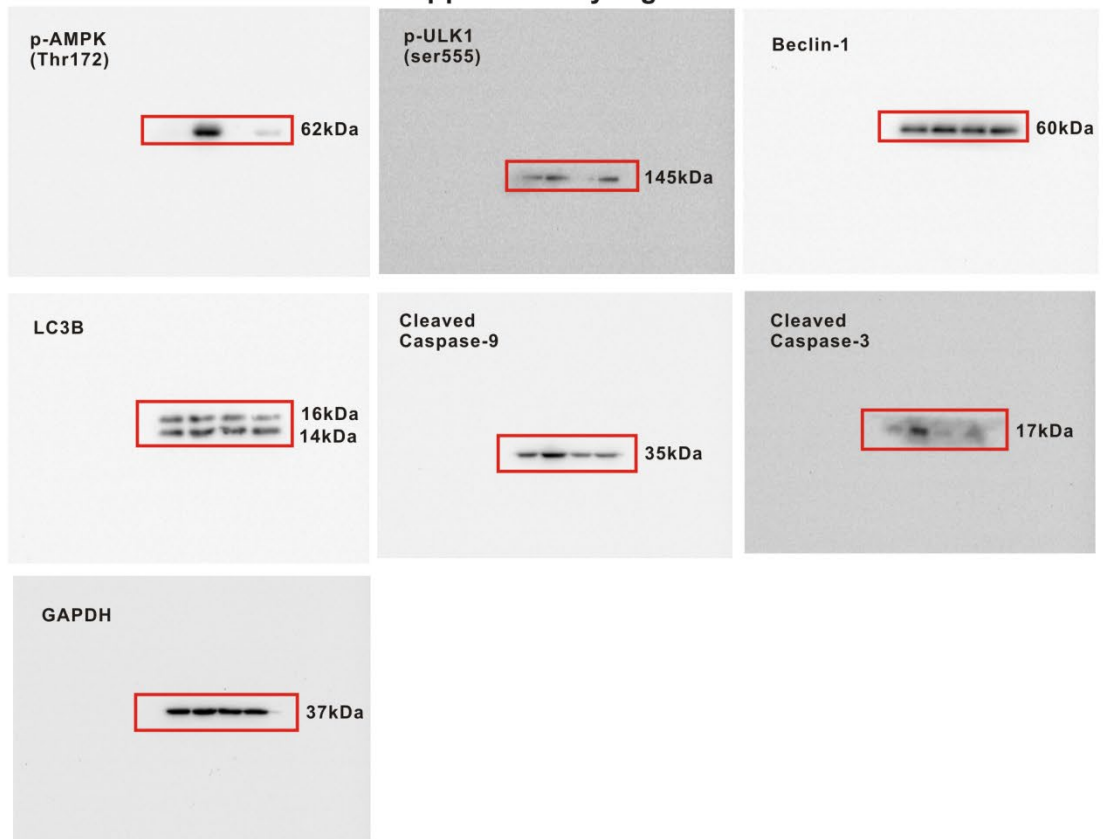



### Supplementary Figure 7D

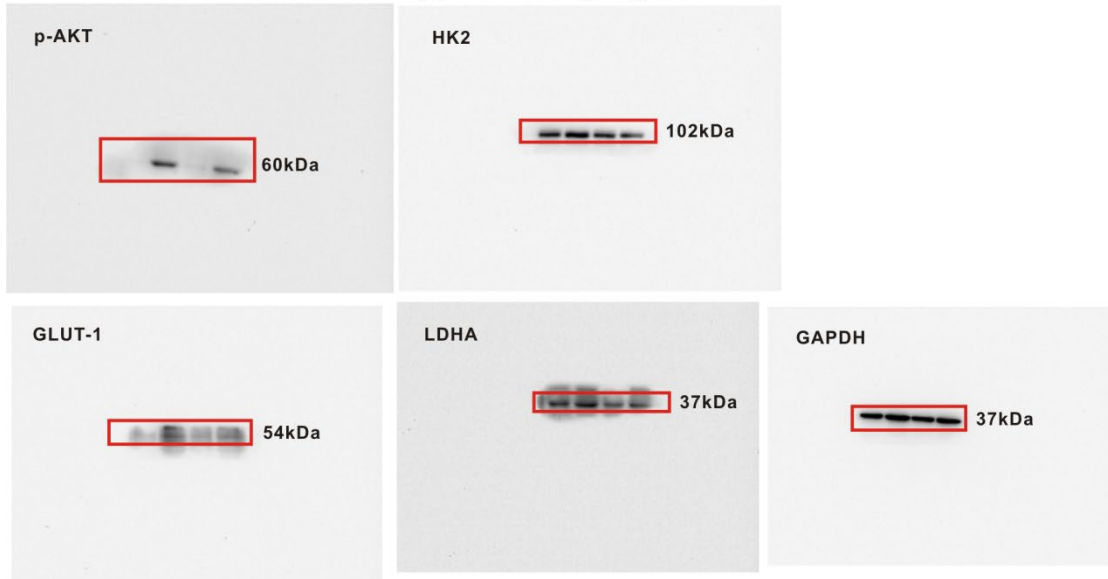

### Supplementary Figure 7E

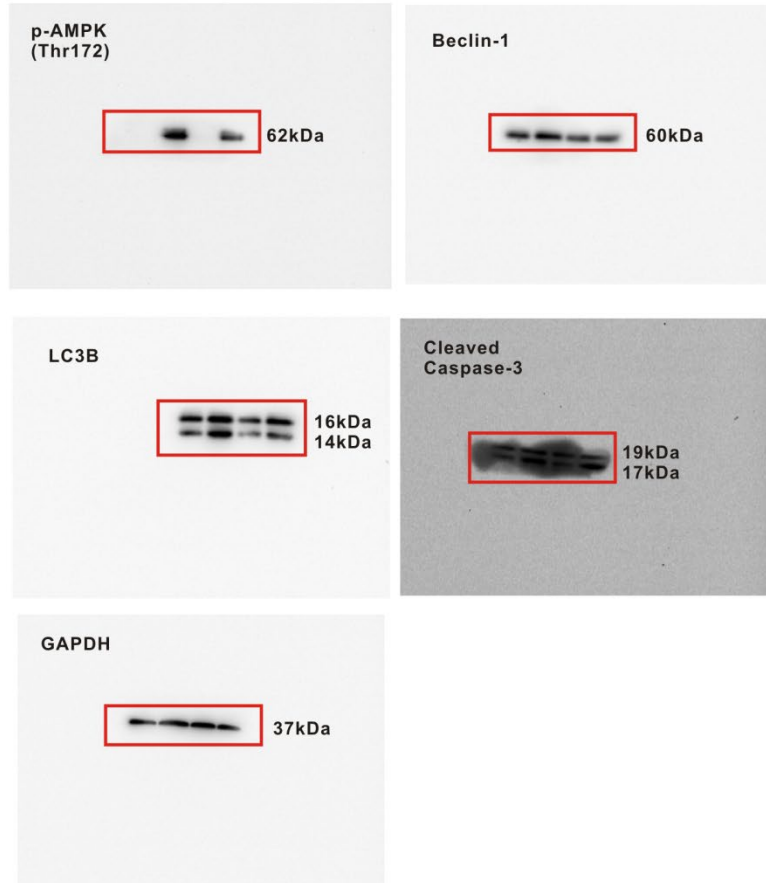

Supplement: 41598_2020_64880_MOESM1_ESM.pdf [file 41598_2020_64880_MOESM1_ESM.pdf]
